# Supplementary material for: Are ChatGPT’s Free-Text Responses on Periprosthetic Joint Infections of the Hip and Knee Reliable and Useful?
Source: MDPI journal article supplement (doi:10.3390/jcm12206655), 2023-10-20
Supplement: s1 [file s1]

**Table S1.** Mean  $\pm$  SD for survey items using a 5-point Likert scale (1-strongly disagree, 5-strongly agree; reversed for “Misleading” and “Errors”) scores and inter-rater reliability for each question (Q1-27) of all three raters based on evaluated aspects.

| Question (Q) | Aspects        | Likert scale |          |          | Mean $\pm$ SD   | Fleiss' kappa* (95% CI [lower, upper]) | <i>p</i>         |
|--------------|----------------|--------------|----------|----------|-----------------|----------------------------------------|------------------|
|              |                | Rater #1     | Rater #2 | Rater #3 |                 |                                        |                  |
| Q1           |                |              |          |          | 4.44 $\pm$ 0.51 | 0.775 [0.313, 1.273]                   | <b>0.001</b>     |
|              | Completeness   | 4            | 4        | 4        |                 |                                        |                  |
|              | Misleading     | 4            | 5        | 5        |                 |                                        |                  |
|              | Errors         | 5            | 5        | 5        |                 |                                        |                  |
|              | Up-to-dateness | 4            | 4        | 4        |                 |                                        |                  |
|              | Patients       | 5            | 5        | 5        |                 |                                        |                  |
|              | Surgeons       | 4            | 4        | 4        |                 |                                        |                  |
| Q2           |                |              |          |          | 4.61 $\pm$ 0.61 | 0.182 [-0.212, 0.576]                  | 0.366            |
|              | Completeness   | 4            | 5        | 4        |                 |                                        |                  |
|              | Misleading     | 5            | 5        | 5        |                 |                                        |                  |
|              | Errors         | 5            | 5        | 5        |                 |                                        |                  |
|              | Up-to-dateness | 4            | 5        | 4        |                 |                                        |                  |
|              | Patients       | 3            | 5        | 4        |                 |                                        |                  |
|              | Surgeons       | 5            | 5        | 5        |                 |                                        |                  |
| Q3           | Completeness   | 4            | 4        | 4        | 4.22 $\pm$ 0.55 | 0.532 [0.139, 0.926]                   | <b>0.008</b>     |
|              | Misleading     | 5            | 4        | 5        |                 |                                        |                  |
|              | Errors         | 5            | 5        | 5        |                 |                                        |                  |
|              | Up-to-dateness | 4            | 4        | 4        |                 |                                        |                  |
|              | Patients       | 3            | 4        | 4        |                 |                                        |                  |
|              | Surgeons       | 4            | 4        | 4        |                 |                                        |                  |
| Q4           | Completeness   | 4            | 5        | 5        | 4.50 $\pm$ 0.51 | 0.556 [0.094, 1.018]                   | <b>0.018</b>     |
|              | Misleading     | 5            | 5        | 5        |                 |                                        |                  |
|              | Errors         | 5            | 5        | 5        |                 |                                        |                  |
|              | Up-to-dateness | 4            | 4        | 4        |                 |                                        |                  |
|              | Patients       | 4            | 5        | 4        |                 |                                        |                  |
|              | Surgeons       | 4            | 4        | 4        |                 |                                        |                  |
| Q5           | Completeness   | 5            | 5        | 5        | 5.00 $\pm$ 0.00 | 1.000                                  | -                |
|              | Misleading     | 5            | 5        | 5        |                 |                                        |                  |
|              | Errors         | 5            | 5        | 5        |                 |                                        |                  |
|              | Up-to-dateness | 5            | 5        | 5        |                 |                                        |                  |
|              | Patients       | 5            | 5        | 5        |                 |                                        |                  |
|              | Surgeons       | 5            | 5        | 5        |                 |                                        |                  |
| Q6           | Completeness   | 4            | 4        | 4        | 4.22 $\pm$ 0.43 | 0.357 [-0.105, 0.819]                  | 0.130            |
|              | Misleading     | 5            | 4        | 5        |                 |                                        |                  |
|              | Errors         | 4            | 4        | 4        |                 |                                        |                  |
|              | Up-to-dateness | 4            | 4        | 4        |                 |                                        |                  |
|              | Patients       | 4            | 4        | 4        |                 |                                        |                  |
|              | Surgeons       | 5            | 4        | 5        |                 |                                        |                  |
| Q7           | Completeness   | 5            | 5        | 5        | 4.83 $\pm$ 0.38 | 1.000 [0.583, 1.462]                   | <b>&lt;0.001</b> |
|              | Misleading     | 5            | 5        | 5        |                 |                                        |                  |
|              | Errors         | 5            | 5        | 5        |                 |                                        |                  |
|              | Up-to-dateness | 5            | 5        | 5        |                 |                                        |                  |
|              | Patients       | 4            | 4        | 4        |                 |                                        |                  |

|     |                |   |   |   |             |                        |                  |
|-----|----------------|---|---|---|-------------|------------------------|------------------|
|     | Surgeons       | 5 | 5 | 5 |             |                        |                  |
| Q8  | Completeness   | 4 | 4 | 4 | 4.44 ± 0.51 | 0.775 [0.313, 1.237]   | <b>0.001</b>     |
|     | Misleading     | 5 | 5 | 5 |             |                        |                  |
|     | Errors         | 5 | 5 | 5 |             |                        |                  |
|     | Up-to-dateness | 4 | 4 | 4 |             |                        |                  |
|     | Patients       | 4 | 4 | 4 |             |                        |                  |
|     | Surgeons       | 5 | 4 | 5 |             |                        |                  |
| Q9  | Completeness   | 3 | 3 | 4 | 4.11 ± 0.76 | 0.654 [0.320, 0.987]   | <b>&lt;0.001</b> |
|     | Misleading     | 5 | 5 | 5 |             |                        |                  |
|     | Errors         | 5 | 5 | 5 |             |                        |                  |
|     | Up-to-dateness | 4 | 4 | 4 |             |                        |                  |
|     | Patients       | 4 | 4 | 4 |             |                        |                  |
|     | Surgeons       | 3 | 3 | 4 |             |                        |                  |
| Q10 | Completeness   | 3 | 3 | 3 | 2.94 ± 0.64 | 0.393 [0.051, 0.736]   | <b>0.024</b>     |
|     | Misleading     | 2 | 2 | 2 |             |                        |                  |
|     | Errors         | 2 | 3 | 3 |             |                        |                  |
|     | Up-to-dateness | 4 | 3 | 3 |             |                        |                  |
|     | Patients       | 4 | 4 | 3 |             |                        |                  |
|     | Surgeons       | 3 | 3 | 3 |             |                        |                  |
| Q11 | Completeness   | 4 | 4 | 4 | 4.11 ± 0.32 | -0.125 [-0.587, 0.337] | 0.596            |
|     | Misleading     | 4 | 4 | 4 |             |                        |                  |
|     | Errors         | 4 | 4 | 4 |             |                        |                  |
|     | Up to date     | 5 | 4 | 4 |             |                        |                  |
|     | Patients       | 4 | 4 | 4 |             |                        |                  |
|     | Surgeons       | 5 | 4 | 4 |             |                        |                  |
| Q12 | Completeness   | 4 | 4 | 4 | 4.11 ± 0.32 | 0.438 [-0.024, 0.899]  | 0.063            |
|     | Misleading     | 4 | 4 | 4 |             |                        |                  |
|     | Errors         | 4 | 4 | 4 |             |                        |                  |
|     | Up-to-dateness | 4 | 4 | 4 |             |                        |                  |
|     | Patients       | 4 | 4 | 4 |             |                        |                  |
|     | Surgeons       | 5 | 4 | 5 |             |                        |                  |
| Q13 | Completeness   | 3 | 3 | 3 | 3.11 ± 0.32 | -0.125 [-0.587, 0.337] | 0.596            |
|     | Misleading     | 3 | 3 | 4 |             |                        |                  |
|     | Errors         | 3 | 3 | 3 |             |                        |                  |
|     | Up-to-dateness | 3 | 3 | 3 |             |                        |                  |
|     | Patients       | 3 | 3 | 3 |             |                        |                  |
|     | Surgeons       | 4 | 3 | 3 |             |                        |                  |
| Q14 | Completeness   | 4 | 4 | 4 | 3.89 ± 0.32 | 0.483 [-0.024, 0.899]  | 0.063            |
|     | Misleading     | 4 | 4 | 4 |             |                        |                  |
|     | Errors         | 4 | 4 | 4 |             |                        |                  |
|     | Up-to-dateness | 4 | 4 | 4 |             |                        |                  |
|     | Patients       | 3 | 4 | 3 |             |                        |                  |
|     | Surgeons       | 4 | 4 | 4 |             |                        |                  |
| Q15 | Completeness   | 5 | 5 | 5 | 4.28 ± 0.46 | 0.446 [-0.016, 0.908]  | 0.058            |
|     | Misleading     | 5 | 4 | 4 |             |                        |                  |
|     | Errors         | 4 | 4 | 4 |             |                        |                  |
|     | Up-to-dateness | 4 | 4 | 4 |             |                        |                  |
|     | Patients       | 4 | 4 | 4 |             |                        |                  |
|     | Surgeons       | 5 | 4 | 4 |             |                        |                  |
| Q16 | Completeness   | 2 | 2 | 2 | 1.94 ± 0.42 | 0.234 [-0.134, 0.602]  | 0.212            |
|     | Misleading     | 2 | 2 | 2 |             |                        |                  |

|     |                |   |   |   |                 |                        |              |
|-----|----------------|---|---|---|-----------------|------------------------|--------------|
|     | Errors         | 2 | 2 | 3 |                 |                        |              |
|     | Up-to-dateness | 2 | 2 | 2 |                 |                        |              |
|     | Patients       | 2 | 2 | 2 |                 |                        |              |
|     | Surgeons       | 2 | 1 | 1 |                 |                        |              |
| Q17 | Completeness   | 3 | 3 | 3 | $3.56 \pm 0.51$ | 0.550 [0.088, 1.012]   | <b>0.020</b> |
|     | Misleading     | 4 | 4 | 3 |                 |                        |              |
|     | Errors         | 4 | 4 | 4 |                 |                        |              |
|     | Up-to-dateness | 4 | 4 | 3 |                 |                        |              |
|     | Patients       | 4 | 4 | 4 |                 |                        |              |
|     | Surgeons       | 3 | 3 | 3 |                 |                        |              |
| Q18 | Completeness   | 4 | 4 | 4 | $4.06 \pm 0.24$ | -0.059 [-0.521, 0.403] | 0.803        |
|     | Misleading     | 4 | 4 | 4 |                 |                        |              |
|     | Errors         | 4 | 4 | 4 |                 |                        |              |
|     | Up-to-dateness | 4 | 4 | 4 |                 |                        |              |
|     | Patients       | 4 | 4 | 4 |                 |                        |              |
|     | Surgeons       | 5 | 4 | 4 |                 |                        |              |
| Q19 | Completeness   | 3 | 3 | 4 | $3.72 \pm 0.58$ | 0.349 [-0.048, 0.747]  | 0.085        |
|     | Misleading     | 4 | 4 | 4 |                 |                        |              |
|     | Errors         | 4 | 4 | 4 |                 |                        |              |
|     | Up-to-dateness | 5 | 4 | 4 |                 |                        |              |
|     | Patients       | 3 | 3 | 3 |                 |                        |              |
|     | Surgeons       | 4 | 3 | 4 |                 |                        |              |
| Q20 | Completeness   | 4 | 4 | 4 | $3.56 \pm 0.51$ | 0.775 [0.313, 1.237]   | <b>0.001</b> |
|     | Misleading     | 3 | 3 | 3 |                 |                        |              |
|     | Errors         | 3 | 3 | 3 |                 |                        |              |
|     | Up-to-dateness | 4 | 4 | 4 |                 |                        |              |
|     | Patients       | 4 | 4 | 4 |                 |                        |              |
|     | Surgeons       | 3 | 3 | 4 |                 |                        |              |
| Q21 | Completeness   | 3 | 3 | 3 | $3.39 \pm 0.70$ | 0.811 [0.446, 1.175]   | <0.001       |
|     | Misleading     | 4 | 4 | 4 |                 |                        |              |
|     | Errors         | 4 | 4 | 4 |                 |                        |              |
|     | Up-to-dateness | 4 | 4 | 4 |                 |                        |              |
|     | Patients       | 3 | 3 | 3 |                 |                        |              |
|     | Surgeons       | 2 | 2 | 3 |                 |                        |              |
| Q22 | Completeness   | 3 | 3 | 3 | $3.17 \pm 0.71$ | 0.273 [-0.071, 0.616]  | 0.120        |
|     | Misleading     | 4 | 3 | 4 |                 |                        |              |
|     | Errors         | 4 | 4 | 4 |                 |                        |              |
|     | Up-to-dateness | 3 | 3 | 4 |                 |                        |              |
|     | Patients       | 2 | 3 | 3 |                 |                        |              |
|     | Surgeons       | 2 | 2 | 3 |                 |                        |              |
| Q23 | Completeness   | 3 | 3 | 3 | $3.17 \pm 0.71$ | 1.000 [0.656, 1.344]   | <0.001       |
|     | Misleading     | 3 | 3 | 3 |                 |                        |              |
|     | Errors         | 4 | 4 | 4 |                 |                        |              |
|     | Up-to-dateness | 4 | 4 | 4 |                 |                        |              |
|     | Patients       | 3 | 3 | 3 |                 |                        |              |
|     | Surgeons       | 2 | 2 | 2 |                 |                        |              |
| Q24 | Completeness   | 5 | 5 | 5 | $4.94 \pm 0.24$ | -0.059 [-0.521, 0.403] | 0.803        |
|     | Misleading     | 5 | 5 | 5 |                 |                        |              |
|     | Errors         | 5 | 5 | 5 |                 |                        |              |
|     | Up-to-dateness | 5 | 5 | 5 |                 |                        |              |
|     | Patients       | 4 | 5 | 5 |                 |                        |              |

|     |                |   |   |   |             |                       |       |
|-----|----------------|---|---|---|-------------|-----------------------|-------|
|     | Surgeons       | 5 | 5 | 5 |             |                       |       |
| Q25 | Completeness   | 4 | 4 | 4 | 3.33 ± 0.49 | 0.500 [0.038, 0.962]  | 0.034 |
|     | Misleading     | 3 | 3 | 3 |             |                       |       |
|     | Errors         | 4 | 4 | 3 |             |                       |       |
|     | Up-to-dateness | 3 | 3 | 4 |             |                       |       |
|     | Patients       | 3 | 3 | 3 |             |                       |       |
|     | Surgeons       | 3 | 3 | 3 |             |                       |       |
| Q26 | Completeness   | 3 | 3 | 3 | 3.11 ± 0.90 | 0.500 [0.190, 0.810]  | 0.002 |
|     | Misleading     | 4 | 4 | 4 |             |                       |       |
|     | Errors         | 4 | 4 | 4 |             |                       |       |
|     | Up-to-dateness | 3 | 3 | 4 |             |                       |       |
|     | Patients       | 2 | 3 | 3 |             |                       |       |
|     | Surgeons       | 1 | 2 | 2 |             |                       |       |
| Q27 | Completeness   | 4 | 4 | 4 | 3.61 ± 0.61 | 0.299 [-0.095, 0.693] | 0.137 |
|     | Misleading     | 4 | 4 | 4 |             |                       |       |
|     | Errors         | 4 | 4 | 4 |             |                       |       |
|     | Up-to-dateness | 3 | 3 | 4 |             |                       |       |
|     | Patients       | 3 | 4 | 4 |             |                       |       |
|     | Surgeons       | 2 | 3 | 3 |             |                       |       |

SD, standard deviation; Q1-27, Question 1-27 of the included questions (Table 1); 95% CI, 95% confidence interval. \*<0.00 indicates poor agreement, 0.00 to 0.20 signifies slight agreement, 0.21 to 0.40 suggests fair agreement, and 0.41 to 0.60 reflects moderate agreement. Substantial agreement is denoted by a Fleiss' kappa of 0.61 to 0.80, while an almost perfect agreement is indicated by a Fleiss' kappa ranging from 0.81 to 1.00. A p<0.05 is considered statistically significant and presented in bold.
